# Supplementary material
Source: Royal Society of Chemistry journal article supplement (doi:10.1039/d6gc00954a)
Supplement: d6gc00954a1.pdf [file d6gc00954a1.pdf]

## **Optimized green extraction of multifunctional aliphatic and aromatic compounds from suberin-rich agro-industrial potato peel waste**

Pedro Florido-Moreno<sup>a</sup>, Diego Rodríguez-Rodríguez<sup>a</sup>, José J. Benítez<sup>b</sup>, Jorge Rencoret<sup>c</sup>, Ekram Wassel<sup>d</sup>, Ruth E. Stark<sup>d,e</sup>, Susana Guzmán-Puyol<sup>a</sup>, José A. Heredia-Guerrero<sup>a\*</sup>, José C. del Río<sup>c</sup>

<sup>a</sup>*Instituto de Hortofruticultura Subtropical y Mediterránea La Mayora, Consejo Superior de Investigaciones Científicas-Universidad de Málaga (IHSM, CSIC-UMA), Bulevar Louis Pasteur 49, Malaga, 29010, Spain.*

<sup>b</sup>*Instituto de Ciencia de Materiales de Sevilla, Centro Mixto CSIC-Universidad de Sevilla, Calle Americo Vespucio 49, Isla de la Cartuja, Sevilla, 41092, Spain.*

<sup>c</sup>*Instituto de Recursos Naturales y Agrobiología de Sevilla, CSIC, Avda. Reina Mercedes, 10, Seville, 41012, Spain.*

<sup>d</sup>*Department of Chemistry and Biochemistry, The City College of New York, City University of New York, and CUNY Institute for Macromolecular Assemblies, 85 Saint Nicholas Terrace, New York, New York 10031, United States.*

<sup>e</sup>*New York Structural Biology Center, 89 Convent Avenue, New York, New York 10027, United States.*

\* Corresponding author: [ja.heredia@csic.es](mailto:ja.heredia@csic.es) (José A. Heredia-Guerrero)

**Table S1.** Variation levels chosen for the variables selected for the optimization of the sodium hydroxide hydrolysis of suberin from potato peel waste by experimental design, i.e., temperature ( $X_1$ ) and time ( $X_2$ ). The results obtained for the responses, i.e., yield (Y) with NaOH solution at 0.1, 0.5, and 1M, are also reported.

| Experiment | Variables  |             | Responses              |                        |                      |
|------------|------------|-------------|------------------------|------------------------|----------------------|
|            | $X_1$ (°C) | $X_2$ (h)   | Y (%)<br>NaOH<br>0.1 M | Y (%)<br>NaOH<br>0.5 M | Y (%)<br>NaOH 1<br>M |
| 1          | 40 (-1)    | 2 (-1)      | 2.2                    | 2.7                    | 8.5                  |
| 2          | 40 (-1)    | 4 (-0.3333) | 3.6                    | 9.1                    | 10.0                 |
| 3          | 40 (-1)    | 6 (+0.3333) | 3.0                    | 16.5                   | 11.9                 |
| 4          | 40 (-1)    | 8 (+1)      | 4.9                    | 20.1                   | 14.6                 |
| 5          | 55 (-0.5)  | 2 (-1)      | 4.2                    | 12.3                   | 15.1                 |
| 6          | 55 (-0.5)  | 4 (-0.3333) | 7.4                    | 12.8                   | 15.3                 |
| 7          | 55 (-0.5)  | 6 (+0.3333) | 4.1                    | 18.0                   | 17.9                 |
| 8          | 55 (-0.5)  | 8 (+1)      | 6.0                    | 19.7                   | 19.4                 |
| 9          | 70 (0)     | 2 (-1)      | 1.7                    | 13.9                   | 14.2                 |
| 10         | 70 (0)     | 4 (-0.3333) | 2.1                    | 24.6                   | 25.1                 |
| 11         | 70 (0)     | 6 (+0.3333) | 0.7                    | 25.8                   | 21.3                 |
| 12         | 70 (0)     | 8 (+1)      | 3.0                    | 24.0                   | 23.6                 |
| 13         | 85 (+0.5)  | 2(-1)       | 6.5                    | 23.5                   | 24.3                 |
| 14         | 85 (+0.5)  | 4 (-0.3333) | 4.8                    | 18.8                   | 23.4                 |
| 15         | 85 (+0.5)  | 6 (+0.3333) | 6.7                    | 22.7                   | 22.9                 |
| 16         | 85 (+0.5)  | 8 (+1)      | 3.5                    | 17.8                   | 22.5                 |
| 17         | 100 (+1)   | 2 (-1)      | 6.4                    | 17.0                   | 22.2                 |
| 18         | 100 (+1)   | 4 (-0.3333) | 6.1                    | 9.7                    | 13.8                 |
| 19         | 100 (+1)   | 6 (+0.3333) | 6.0                    | 9.8                    | 7.1                  |
| 20         | 100 (+1)   | 8 (+1)      | 6.9                    | 11.3                   | 11.6                 |

**Table S2.** Polynomial equations generated to evaluate the relationship between process variables, i.e., hydrolysis temperature ( $X_1$ ) and time ( $X_2$ ), and responses, i.e., recovery yields at different NaOH concentrations.

| <b>NaOH concentration</b> | <b>Polynomial equations</b>                                               |
|---------------------------|---------------------------------------------------------------------------|
| 0.1 M                     | $Y (\%) = 3.72 + 1.16X_1 + 0.18X_2 - 0.62X_1X_2 + 1.41X_1^2 + 0.10X_2^2$  |
| 0.5 M                     | $Y (\%) = 21.49 + 0.93X_1 + 2.61X_2 - 5.83X_1X_2 - 9.26X_1^2 - 0.64X_2^2$ |
| 1 M                       | $Y (\%) = 21.40 + 2.25X_1 + 0.48X_2 - 4.16X_1X_2 - 9.26X_1^2 + 0.82X_2^2$ |
